# Supplementary material
Source: Research Square preprint supplement (doi:10.21203/rs.3.rs-9016941/v1)

Graphical Abstract


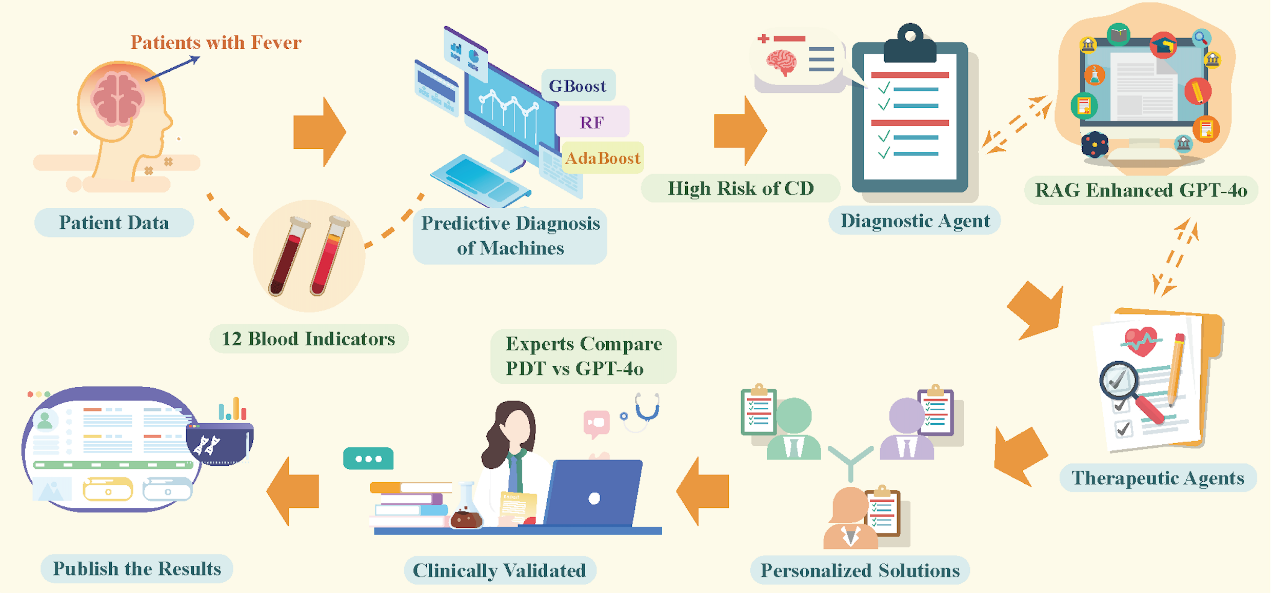

Supplement: Supplementary file 1 [file 171740b7d5964d162de2c259.docx]
